# Supplementary material for: The use of novel electronic nose technology to locate missing persons for criminal investigations
Source: PubMed Central journal article supplement — iScience. 2023 Mar 7;26(4):106353. doi: 10.1016/j.isci.2023.106353 (PMC10040731; doi:10.1016/j.isci.2023.106353), 2023-03-07
Supplement: mmc1.pdf [file mmc1.pdf]

**iScience, Volume 26**

**Supplemental information**

**The use of novel electronic  
nose technology to locate missing  
persons for criminal investigations**

**Amber Brown, Erin Lamb, Alisha Deo, Daniel Pasin, Taoping Liu, Wentian Zhang, Steven Su, and Maiken Ueland**

## Supplementary Materials for

### **The use of novel electronic nose technology to locate missing persons for criminal investigations**

Amber Brown, Erin Lamb, Alisha Deo, Daniel Pasin, Taoping Liu, Wentian Zhang, Steven Su,  
Maiken Ueland\*

\*Corresponding author. Email: [maiken.ueland@uts.edu.au](mailto:maiken.ueland@uts.edu.au)

#### **This PDF file includes:**

Figures. S1 to S5

Tables S1 to S2

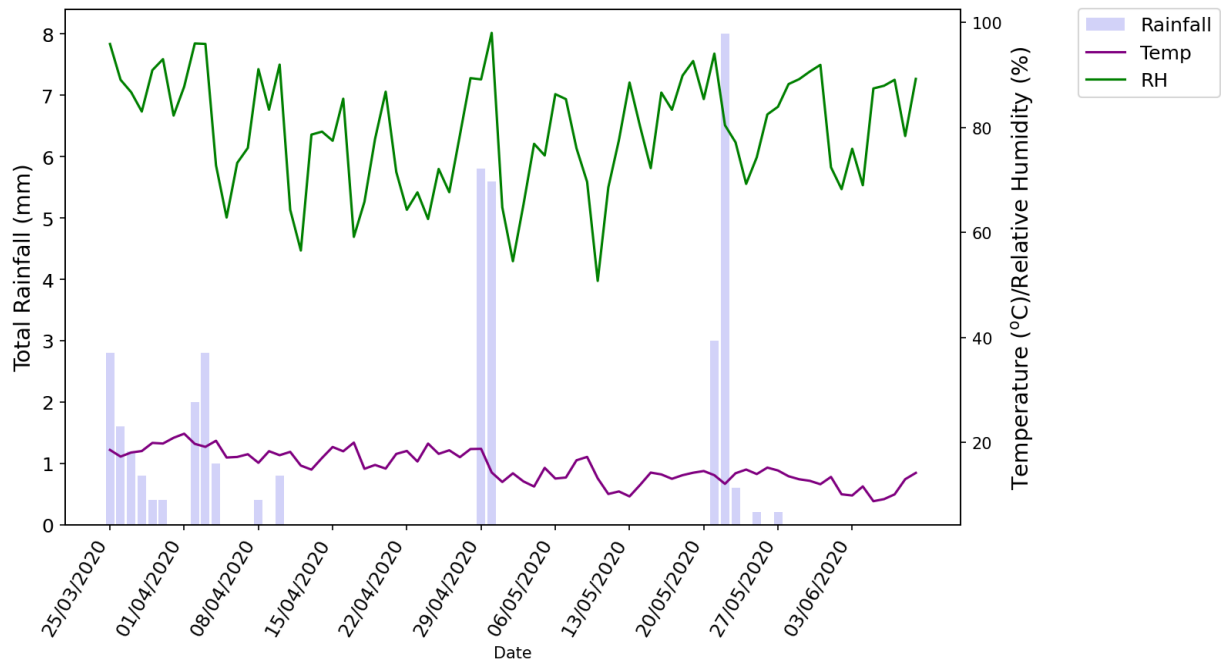

**Figure S1: Environmental data.** Daily average temperature, total daily rainfall data and relative humidity observed during the trial. Related to Figure 1.

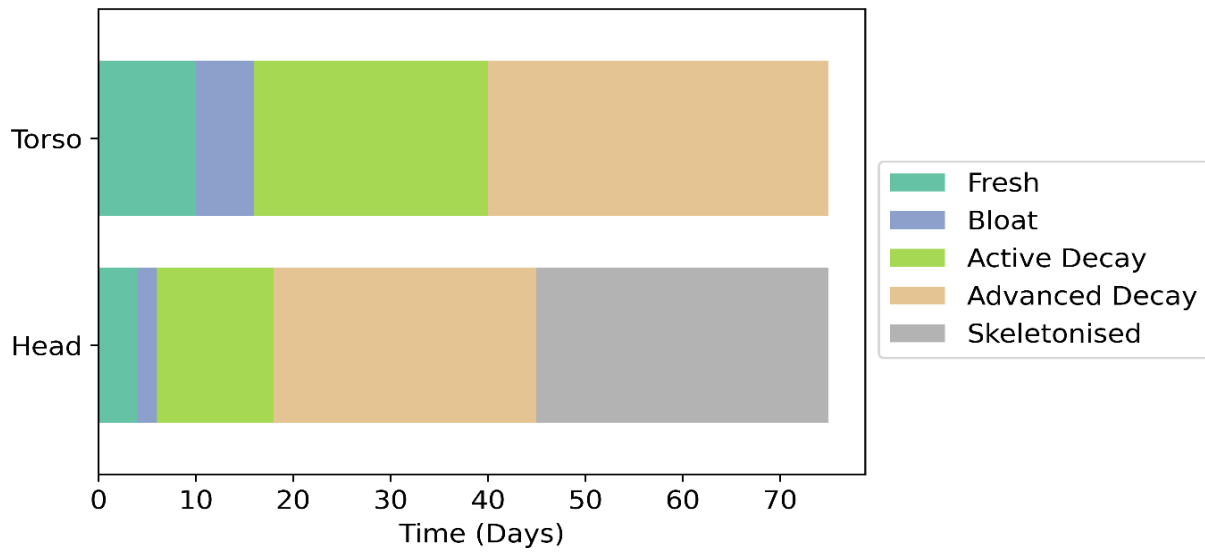

**Figure S2: Visual evaluation.** Visual classifications of the head and torso of the sampled human donor during the trial. Related to Figure 1.

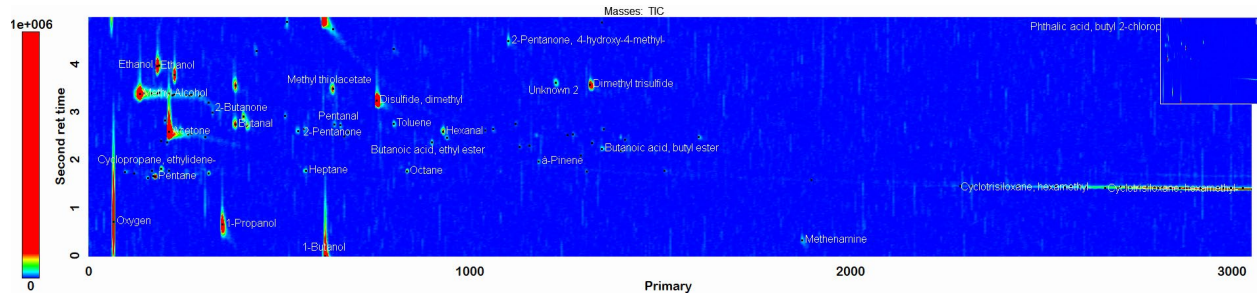

**Figure S3: GCxGC-TOFMS Contour plot.** Example contour plot from day 35 postmortem. Showing presence of compounds associated with human decomposition. Related to Figure 7 and Figure 8.

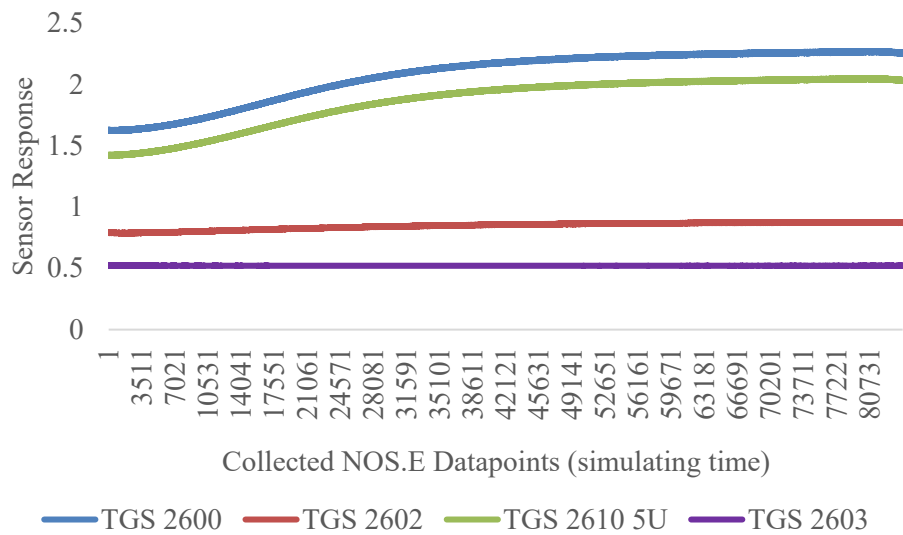

**Figure S4. NOS.E sensor selection test 1.** NOS.E Sensors that responded to a cadaver torso within a body bag. Related to STAR Methods.

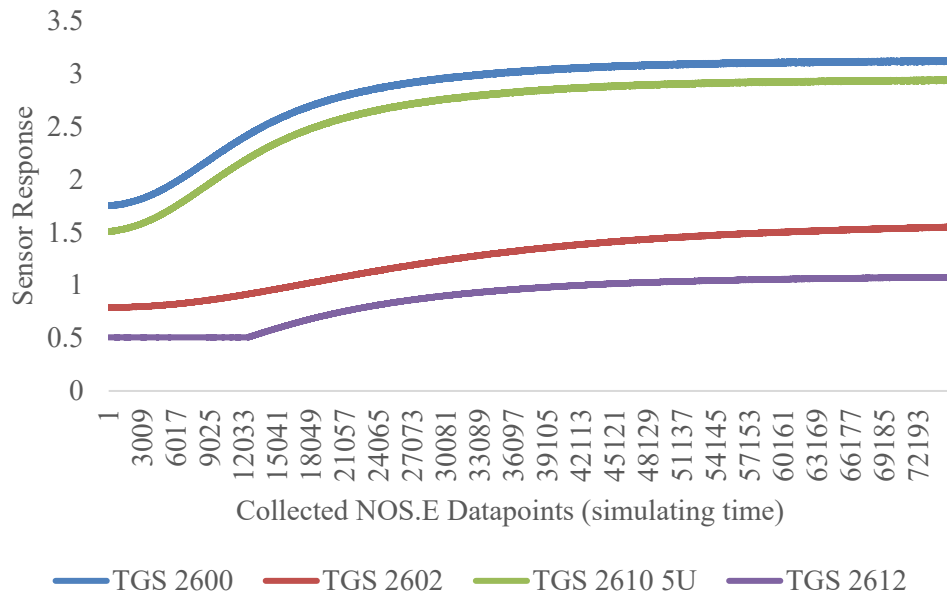

**Figure S5. NOS.E sensor selection test 2. NOS.E Sensors that responded to exposed cadaver intestines within a body bag. Related to STAR Methods.**

**Table S1.**

Table S1: Sensor configuration of the NOS.E used for human remains sampling. Related to STAR Methods.

| <b>Sensor</b> | <b>Sensor name</b> | <b>Target Gases</b> |
|---------------|--------------------|---------------------|
| Sensor 1      | TGS 2610 5U        | Alcohols/Alkanes    |
| Sensor 2      | TGS 2600           | Alcohols/Alkanes    |
| Sensor 3      | TGS 2612 5U        | Alkanes             |
| Sensor 4      | TGS 2603           | Sulfur/Nitrogen     |
| Sensor 5      | TGS 2602           | Nitrogen/Sulfur     |



**Table S2.**

Table S2: Sampling days of NOS.E and GC×GC-TOFMS method. Related to STAR Methods.

| <b>Technique</b> | <b>Sampling day</b> |   |   |   |    |    |    |    |    |    |    |    |    |    |
|------------------|---------------------|---|---|---|----|----|----|----|----|----|----|----|----|----|
| E-nose           | 1                   | 3 | 5 | 7 | 10 | 13 | 16 | 20 | 23 | 41 | 49 | 59 | 68 | 76 |
| GC×GC            | 2                   | 3 | 5 | 7 | 10 | 14 | 16 | 20 | 24 | 40 | 50 | 60 | 70 | 75 |
